# Supplementary material for: Comprehensive Analysis of Rice Laccase Gene (OsLAC) Family and Ectopic Expression of OsLAC10 Enhances Tolerance to Copper Stress in Arabidopsis
Source: Int J Mol Sci. 2017 Jan 30;18(2):209. doi: 10.3390/ijms18020209 (PMC5343771; doi:10.3390/ijms18020209)
Supplement: Supplementary file 1 [file ijms-18-00209-s001.xlsx]

## Sheet: Table S1
Table S1. Sequence identity matrix of rice laccase protein sequences.								Table S1. Sequence identity matrix of rice laccase protein sequences.
	OsLAC1	OsLAC2	OsLAC3	OsLAC4	OsLAC5	OsLAC6	OsLAC7	OsLAC8	OsLAC9	OsLAC10	OsLAC11	OsLAC12	OsLAC13	OsLAC14	OsLAC15	OsLAC16	OsLAC17	OsLAC18	OsLAC19	OsLAC20	OsLAC21	OsLAC22	OsLAC23	OsLAC24	OsLAC25	OsLAC26	OsLAC27	OsLAC28	OsLAC29	OsLAC30
OsLAC1		0.484	0.448	0.46	0.472	0.446	0.37	0.431	0.443	0.839	0.465	0.429	0.417	0.429	0.47	0.448	0.386	0.115	0.684	0.458	0.458	0.39	0.395	0.393	0.771	0.46	0.46	0.419	0.431	0.431
OsLAC2	0.484		0.565	0.642	0.649	0.608	0.45	0.517	0.505	0.544	0.618	0.553	0.563	0.565	0.642	0.532	0.45	0.072	0.429	0.57	0.57	0.477	0.46	0.446	0.522	0.656	0.57	0.532	0.537	0.549
OsLAC3	0.448	0.565		0.585	0.58	0.557	0.473	0.552	0.548	0.508	0.589	0.714	0.561	0.546	0.604	0.545	0.472	0.062	0.416	0.737	0.737	0.484	0.491	0.477	0.496	0.561	0.739	0.56	0.563	0.553
OsLAC4	0.46	0.642	0.585		0.796	0.695	0.472	0.534	0.529	0.522	0.748	0.553	0.64	0.714	0.793	0.57	0.453	0.059	0.431	0.565	0.565	0.484	0.479	0.472	0.503	0.661	0.568	0.537	0.561	0.558
OsLAC5	0.472	0.649	0.58	0.796		0.683	0.446	0.529	0.529	0.529	0.743	0.546	0.621	0.762	0.844	0.546	0.453	0.069	0.424	0.553	0.553	0.479	0.47	0.46	0.503	0.661	0.553	0.51	0.534	0.513
OsLAC6	0.446	0.608	0.557	0.695	0.683		0.431	0.495	0.5	0.496	0.685	0.524	0.688	0.637	0.707	0.519	0.426	0.067	0.388	0.52	0.52	0.431	0.412	0.407	0.479	0.598	0.525	0.501	0.52	0.525
OsLAC7	0.37	0.45	0.473	0.472	0.446	0.431		0.521	0.538	0.431	0.462	0.48	0.433	0.414	0.462	0.569	0.426	0	0.417	0.478	0.478	0.446	0.441	0.417	0.414	0.455	0.475	0.621	0.604	0.597
OsLAC8	0.431	0.517	0.552	0.534	0.529	0.495	0.521		0.628	0.494	0.517	0.531	0.462	0.489	0.544	0.626	0.477	0.053	0.418	0.557	0.557	0.494	0.486	0.479	0.484	0.508	0.555	0.617	0.616	0.616
OsLAC9	0.443	0.505	0.548	0.529	0.529	0.5	0.538	0.628		0.505	0.52	0.528	0.48	0.485	0.539	0.636	0.505	0.045	0.432	0.545	0.545	0.501	0.503	0.503	0.489	0.517	0.545	0.612	0.613	0.601
OsLAC10	0.839	0.544	0.508	0.522	0.529	0.496	0.431	0.494	0.505		0.515	0.494	0.467	0.477	0.517	0.505	0.448	0.114	0.747	0.51	0.51	0.446	0.446	0.441	0.842	0.525	0.513	0.486	0.494	0.505
OsLAC11	0.465	0.618	0.589	0.748	0.743	0.685	0.462	0.517	0.52	0.515		0.549	0.649	0.654	0.729	0.575	0.453	0.069	0.412	0.568	0.568	0.491	0.482	0.472	0.494	0.664	0.573	0.532	0.551	0.541
OsLAC12	0.429	0.553	0.714	0.553	0.546	0.524	0.48	0.531	0.528	0.494	0.549		0.525	0.503	0.551	0.55	0.477	0.06	0.404	0.679	0.679	0.47	0.465	0.462	0.467	0.539	0.681	0.545	0.549	0.558
OsLAC13	0.417	0.563	0.561	0.64	0.621	0.688	0.433	0.462	0.48	0.467	0.649	0.525		0.653	0.628	0.527	0.405	0.061	0.377	0.529	0.529	0.412	0.407	0.405	0.448	0.539	0.534	0.479	0.494	0.477
OsLAC14	0.429	0.565	0.546	0.714	0.762	0.637	0.414	0.489	0.485	0.477	0.654	0.503	0.653		0.899	0.501	0.432	0.068	0.378	0.51	0.51	0.434	0.434	0.424	0.453	0.589	0.51	0.494	0.503	0.484
OsLAC15	0.47	0.642	0.604	0.793	0.844	0.707	0.462	0.544	0.539	0.517	0.729	0.551	0.628	0.899		0.561	0.472	0.064	0.419	0.57	0.57	0.472	0.472	0.462	0.498	0.657	0.57	0.541	0.551	0.534
OsLAC16	0.448	0.532	0.545	0.57	0.546	0.519	0.569	0.626	0.636	0.505	0.575	0.55	0.527	0.501	0.561		0.513	0.06	0.413	0.56	0.56	0.517	0.501	0.491	0.477	0.534	0.56	0.668	0.635	0.659
OsLAC17	0.386	0.45	0.472	0.453	0.453	0.426	0.426	0.477	0.505	0.448	0.453	0.477	0.405	0.432	0.472	0.513		0.058	0.366	0.467	0.467	0.625	0.61	0.603	0.431	0.455	0.465	0.522	0.51	0.503
OsLAC18	0.115	0.072	0.062	0.059	0.069	0.067	0	0.053	0.045	0.114	0.069	0.06	0.061	0.068	0.064	0.06	0.058		0.013	0.065	0.065	0.06	0.06	0.055	0.104	0.072	0.065	0.055	0.055	0.055
OsLAC19	0.684	0.429	0.416	0.431	0.424	0.388	0.417	0.418	0.432	0.747	0.412	0.404	0.377	0.378	0.419	0.413	0.366	0.013		0.416	0.416	0.369	0.369	0.371	0.696	0.417	0.419	0.391	0.407	0.41
OsLAC20	0.458	0.57	0.737	0.565	0.553	0.52	0.478	0.557	0.545	0.51	0.568	0.679	0.529	0.51	0.57	0.56	0.467	0.065	0.416		1	0.474	0.474	0.458	0.491	0.551	0.987	0.557	0.546	0.544
OsLAC21	0.458	0.57	0.737	0.565	0.553	0.52	0.478	0.557	0.545	0.51	0.568	0.679	0.529	0.51	0.57	0.56	0.467	0.065	0.416	1		0.474	0.474	0.458	0.491	0.551	0.987	0.557	0.546	0.544
OsLAC22	0.39	0.477	0.484	0.484	0.479	0.431	0.446	0.494	0.501	0.446	0.491	0.47	0.412	0.434	0.472	0.517	0.625	0.06	0.369	0.474	0.474		0.899	0.867	0.438	0.474	0.474	0.522	0.508	0.51
OsLAC23	0.395	0.46	0.491	0.479	0.47	0.412	0.441	0.486	0.503	0.446	0.482	0.465	0.407	0.434	0.472	0.501	0.61	0.06	0.369	0.474	0.474	0.899		0.906	0.443	0.46	0.474	0.522	0.52	0.508
OsLAC24	0.393	0.446	0.477	0.472	0.46	0.407	0.417	0.479	0.503	0.441	0.472	0.462	0.405	0.424	0.462	0.491	0.603	0.055	0.371	0.458	0.458	0.867	0.906		0.436	0.453	0.458	0.515	0.503	0.498
OsLAC25	0.771	0.522	0.496	0.503	0.503	0.479	0.414	0.484	0.489	0.842	0.494	0.467	0.448	0.453	0.498	0.477	0.431	0.104	0.696	0.491	0.491	0.438	0.443	0.436		0.498	0.491	0.477	0.479	0.482
OsLAC26	0.46	0.656	0.561	0.661	0.661	0.598	0.455	0.508	0.517	0.525	0.664	0.539	0.539	0.589	0.657	0.534	0.455	0.072	0.417	0.551	0.551	0.474	0.46	0.453	0.498		0.553	0.525	0.541	0.539
OsLAC27	0.46	0.57	0.739	0.568	0.553	0.525	0.475	0.555	0.545	0.513	0.573	0.681	0.534	0.51	0.57	0.56	0.465	0.065	0.419	0.987	0.987	0.474	0.474	0.458	0.491	0.553		0.555	0.546	0.541
OsLAC28	0.419	0.532	0.56	0.537	0.51	0.501	0.621	0.617	0.612	0.486	0.532	0.545	0.479	0.494	0.541	0.668	0.522	0.055	0.391	0.557	0.557	0.522	0.522	0.515	0.477	0.525	0.555		0.774	0.817
OsLAC29	0.431	0.537	0.563	0.561	0.534	0.52	0.604	0.616	0.613	0.494	0.551	0.549	0.494	0.503	0.551	0.635	0.51	0.055	0.407	0.546	0.546	0.508	0.52	0.503	0.479	0.541	0.546	0.774		0.786
OsLAC30	0.431	0.549	0.553	0.558	0.513	0.525	0.597	0.616	0.601	0.505	0.541	0.558	0.477	0.484	0.534	0.659	0.503	0.055	0.41	0.544	0.544	0.51	0.508	0.498	0.482	0.539	0.541	0.817	0.786

## Sheet: Table S2
Table S2. The normalized spatiotemporal expression signal intensities of rice laccase genes.
	Leaf Blade						Leaf Sheath				Root				Stem				Inflorescence			Anther				Pistil			Lemma, Palea						Ovary				Embryo					Endosperm
	Vegetative		Reproductive		Ripening		Vegetative		Reproductive		Vegetative		Reproductive		Reproductive		Ripenin												Lemma	Palea	Lemma	Palea	Lemma	Palea
Gene Name	12:00:00	00:00:00	12:00:00	00:00:00	12:00:00	00:00:00	12:00:00	00:00:00	12:00:00	00:00:00	12:00:00	00:00:00	12:00:00	00:00:00	12:00:00	00:00:00	12:00:00	00:00:00	0.6-1.0	3.0-4.0	5.0-10.0	0.3-0.6	0.7-1.0	1.2-1.5	1.6-2.0	2015-05-10	2015-10-14	14-18	1.5-2.0	1.5-2.0	4.0-5.0	4.0-5.0	7	7	01 DAF	03 DAF	05 DAF	07 DAF	07 DAF	10 DAF	14 DAF	28 DAF	42 DAF	07 DAF	10 DAF	14 DAF	28 DAF	42 DAF
																			mm	mm	mm	mm	mm	mm	mm	cm	cm	cm	mm	mm	mm	mm	mm	mm
OsLAC1	-7.333	-8.032	-8.5	-8.895	-8.503	-8.998	-7.644	-8.467	-6.476	-8.439	-4.128	-3.498	-4.481	-5.196	-8.201	-8.336	-7.691	-8.434	-7.135	-6.939	-7.948	-6.078	-6.384	-5.779	-7.556	-7.011	-6.22	-6.685	-6.119	-6.353	-5.626	-5.946	-5.632	-5.597	-5.604	-7.045	-6.975	-7.533	-7.641	-7.866	-8.491	-8.24	-7.366	-7.46	-7.085	-6.683	-5.563	-7.379
OsLAC3	-8.145	-8.693	-8.807	-9.25	-8.515	-7.193	-2.222	-2.044	-5.801	-5.846	1.32	0.8755	-0.07951	-0.4816	-3.757	-5.432	-1.485	-4.334	-8.684	-9.066	-8.524	-9.209	-9.167	-7.05	-9.282	-8.669	-9.891	-9.628	-8.303	-7.888	-9.186	-8.642	-9.484	-9.093	-1.954	-7.524	-5.642	-3.834	-8.918	-9.457	-8.562	-8.563	-6.964	-3.906	-2.84	-3.105	-7.064	-7.533
OsLAC4	-7.077	-8.834	-8.615	-9.269	-8.54	-9.042	-3.325	-2.967	-6.51	-8.657	-2.444	-2.18	-3.794	-4.627	-2.824	0.7843	1.788	0.1353	-8.725	-6.688	-6.676	-9.256	-6.694	-6.137	-7.201	-8.17	-7.404	-7.786	-7.785	-7.302	-3.929	-3.639	-3.526	-1.949	-6.772	-8.334	-9.356	-9.18	-9.892	-9.3	-8.53	-8.593	-7.371	-8.113	-8.274	-7.943	-6.267	-7.199
OsLAC5	-7.048	-5.457	-9.02	-9.464	-8.032	-9.275	-2.049	-1.162	-6.734	-7.802	-0.4283	-0.3623	-1.629	-2.227	-1.251	-0.1001	0.8787	-2.553	-8.162	-6.019	-5.518	-7.817	-5.829	-5.001	-0.38	-8.25	-6.481	-5.144	-7.786	-6.045	-3.679	-2.399	-0.8565	0.5877	-4.718	-4.663	-6.285	-8.879	-10.2	-9.782	-8.794	-8.945	-7.69	-8.392	-8.556	-8.26	-7.442	-8.284
OsLAC6	-8.595	-8.912	-9.097	-9.158	-8.445	-9.037	-8.02	-7.839	-6.562	-7.853	-6.484	-5.911	-5.177	-5.964	-8.139	-8.651	-8.057	-8.492	-7.663	-8.734	-8.589	-7.56	-7.034	-8.317	-8.467	-7.817	-7.585	-8.119	-7.541	-7.347	-7.83	-7.58	-8.647	-9.399	-7.072	-8.481	-7.948	-8.709	-7.695	-8.11	-8.961	-7.445	-7.016	-7.538	-7.028	-5.273	-5.894	-7.257
OsLAC8	-2.233	-2.633	-1.937	-1.16	-8.46	-8.924	0.162	-0.9005	-0.4251	-1.448	2.226	1.52	1.595	1.132	-5.727	-3.421	0.5862	1.433	-7.056	-8.929	-8.741	-6.964	-7.671	-5.503	-4.761	-5.365	-6.37	-7.871	-6.955	-7.083	-4.965	-5.011	-6.342	-4.852	-5.633	-6.513	-3.591	-0.9449	-9.687	-9.17	-7.947	-8.018	-5.757	-1.015	-0.9162	-0.2816	-3.034	-4.373
OsLAC9	-8.395	-8.762	-8.716	-7.843	-8.272	-8.966	-4.231	-3.246	-5.979	-7.206	-0.505	0.2924	-1.064	-0.8483	-8.511	-8.281	-6.496	-8.389	-8.612	-8.99	-8.907	-9.138	-9.364	-9.545	-8.409	-9.734	-8.862	-9.566	-8.209	-7.825	-9.082	-8.559	-2.234	-2.098	-8.697	-8.897	-9.228	-9.053	-9.761	-9.237	-8.346	-8.484	-7.252	-7.998	-8.194	-7.576	-6.973	-7.853
OsLAC11	-8.151	-7.547	-9.071	-9.52	-8.818	-9.305	-6.784	-5.645	-6.572	-8.732	-3.222	-3.308	-3.949	-5.151	-3.781	-0.8527	-0.5826	-1.003	-8.995	-9.393	-9.236	-7.46	-8.855	-8.956	-9.534	-9.313	-8.6	-9.153	-8.627	-8.098	-4.549	-6.059	-1.315	-0.7989	-7.748	-8.209	-8.384	-9.332	-9.794	-9.516	-8.933	-8.954	-7.443	-8.034	-8.575	-7.283	-7.472	-8.283
OsLAC12	-8.303	-8.283	-8.409	-9.3	-8.773	-8.875	-4.287	-4.038	-6.575	-8.327	1.569	1.885	-0.1866	-0.2215	-3.218	-5.461	-1.079	-5.254	-5.725	-5.507	-6.818	-7.645	-1.96	1.931	-2.122	-7.57	-7.329	-7.843	-8.494	-7.972	-6.02	-5.67	-9.155	-9.205	-0.9375	-1.794	-1.757	-1.761	-9.732	-9.452	-8.668	-8.142	-7.12	-2.137	-1.545	-1.736	-7.106	-7.005
OsLAC13	-3.202	-4.075	-4.237	-5.1	-3.541	-3.763	-3.159	-2.901	-4.226	-4.306	1.312	1.139	0.4147	0.09143	-3.311	-3.15	-2.223	-3.107	-4.81	-4.923	-4.948	-4.286	-4.377	-4.36	-2.457	-4.679	-4.552	-4.571	-4.006	-3.605	-3.762	-3.658	-4.083	-4.183	-3.646	-4.413	-5.026	-4.814	-5.459	-6.408	-6.519	-5.383	-5.027	-4.302	-3.155	-2.897	-1.303	-2.319
OsLAC14	-8.294	-8.837	-8.703	-9.175	-8.286	-8.976	-1.471	0.0054	-6.465	-8.641	-3.602	-5.496	-8.143	-8.702	-3.932	-5.573	-3.395	-5.237	-7.444	-5.13	-4.351	-8.896	-6.241	-5.826	-9.6	-3.73	-4.418	-6.149	-7.645	-5.401	-5.432	-2.903	-4.878	-4.845	-6.773	-6.367	-9.363	-9.142	-9.931	-9.281	-8.118	-8.62	-7.388	-8.14	-8.305	-7.994	-7.154	-8.051
OsLAC15	-8.607	-8.963	-8.943	-9.398	-8.701	-9.202	-2.184	-0.765	-6.659	-8.819	-2.945	-3.727	-5.827	-6.659	-3.429	-3.661	-2.097	-5.104	-8.153	-4.339	-4.158	-7.26	-4.535	-4.776	-9.276	-5.148	-4.384	-3.63	-7.575	-5.138	-2.877	-2.014	-3.617	-3.381	-4.715	-4.224	-6.202	-9.299	-10.07	-9.64	-8.458	-8.809	-7.562	-8.272	-8.418	-8.097	-7.307	-8.141
OsLAC16	-7.3	-8.801	-7.889	-8.136	-6.986	-8.263	-5.897	-5.535	-6.721	-7.179	-2.142	-2.49	-3.079	-3.789	-5.14	-5.336	-2.487	-5.227	-7.289	-9.319	-8.565	-7.435	-7.834	-8.739	-8.635	-8.191	-7.491	-7.784	-7.703	-7.343	-6.768	-6.954	-4.185	-4.069	-7.298	-8.112	-9.019	-8.427	-8.666	-9.382	-8.34	-7.08	-6.42	-8.03	-7.863	-7.946	-5.113	-7.448
OsLAC17	-8.473	-8.845	-8.852	-9.286	-6.845	-6.326	-9.437	-8.76	-6.515	-8.381	-4.746	-4.003	-0.1593	-0.5568	-9.443	-9.607	-9.217	-9.467	-8.735	-9.128	-9.026	-9.271	-9.75	-9.691	-9.652	-9.931	-9.613	-10.22	-8.321	-7.914	-9.401	-9.091	-9.6	-9.607	-9.068	-9.001	-9.372	-9.175	-9.917	-9.479	-8.208	-8.638	-7.408	-8.136	-8.27	-7.962	-7.165	-7.999
OsLAC21	-5.597	-5.289	-6.86	-6.984	-5.439	-5.638	-4.326	-3.784	-5.138	-6.334	-0.5839	-1.114	-1.561	-2.162	-1.099	-2.975	-2.815	-4.55	-6.413	-6.981	-7.136	-5.802	-5.579	-0.5966	-3.561	-5.348	-4.904	-4.581	-5.19	-5.247	-1.559	-2.398	-5.436	-5.893	-3.448	-3.004	-2.306	-3.317	-7.106	-8.099	-8.087	-7.301	-6.373	-3.458	-2.958	-2.861	-4.587	-5.299
OsLAC22	-8.506	-8.84	-8.741	-9.192	-8.489	-8.984	-9.303	-9.662	-6.52	-8.648	-9.27	-8.951	-7.993	-8.031	-9.461	-9.332	-9.118	-9.432	-8.716	-9.103	-8.302	-9.194	-9.711	-9.662	-9.623	-10.24	-9.928	-10.19	-8.331	-7.29	-9.553	-9.095	-9.601	-9.621	-9.584	-9.033	-9.353	-9.025	-9.891	-9.354	-8.473	-8.609	-7.407	-7.992	-8.018	-7.978	-7.098	-8.004
OsLAC23	-8.118	-8.73	-8.772	-8.663	-6.627	-5.232	-8.325	-8.104	-6.358	-7.922	-4.365	-3.9	-2.544	-2.406	-9.334	-9.492	-9.101	-9.309	-8.584	-8.218	-8.47	-9.116	-9.607	-9.537	-9.528	-10.13	-9.814	-10.09	-8.183	-7.78	-9.425	-8.948	-9.477	-9.351	-9.475	-8.832	-9.244	-9.03	-9.774	-9.271	-7.736	-8.245	-7.264	-7.595	-6.553	-7.871	-5.548	-7.911
OsLAC24	-4.945	-6.97	-8.913	-9.351	-8.366	-9.15	-3.169	-5.364	-6.657	-8.461	-4.723	-4.576	-4.763	-6.266	-6.82	-3.336	-3.998	-7.212	-8.872	-9.27	-8.532	-6.012	-8.815	-8.497	-9.028	-8.194	-8.391	-8.457	-7.896	-8.09	-8.573	-8.737	-9.059	-8.942	-7.554	-9.19	-9.255	-9.312	-9.08	-9.4	-8.744	-8.764	-7.537	-7.148	-8.421	-8.128	-7.289	-8.125
OsLAC25	-8.337	-8.67	-8.649	-9.097	-7.884	-8.897	-8.809	-9.017	-6.334	-8.454	-1.899	-1.459	-3.916	-4.426	-8.461	-7.493	-9.084	-8.281	-5.164	-4.428	-6.229	-5.502	-6.74	-6.503	-9.007	-7.853	-7.407	-6.967	-8.138	-7.62	-7.872	-7.5	-9.273	-9.473	-8.084	-8.811	-6.263	-8.157	-8.863	-8.451	-8.199	-8.432	-7.186	-7.714	-8.108	-7.815	-6.991	-7.897
OsLAC26	-7.258	-6.916	-7.005	-8.958	-8.694	-7.939	-4.69	-4.167	-5.83	-8.228	0.6053	0.9036	-0.1517	-1.222	-3.142	-1.382	-0.0396	-1.79	-8.254	-8.345	-7.727	-5.169	-6.509	-6.695	-2.873	-7.09	-6.283	-6.355	-6.495	-6.543	-2.181	-2.32	-5.375	-3.921	-5.518	-6.596	-9.012	-9.355	-8.719	-9.35	-7.827	-8.86	-7.611	-8.315	-8.495	-8.159	-7.355	-7.689
OsLAC27	-8.661	-8.653	-8.9	-9.353	-8.619	-9.113	-7.67	-6.853	-6.65	-8.817	-3.692	-4.252	-5.451	-5.682	-4.803	-7.527	-6.179	-8.507	-8.874	-9.259	-9.157	-9.39	-9.888	-3.961	-7.748	-10.09	-9.896	-9.848	-8.485	-8.008	-5.791	-6.887	-9.71	-9.628	-7.411	-7.634	-6.756	-7.611	-10.05	-9.632	-8.742	-8.734	-7.535	-7.644	-6.918	-6.859	-7.217	-8.085
OsLAC28	-7.276	-7.907	-8.461	-8.961	-7.171	-4.292	-6.969	-7.364	-6.259	-8.086	-5.316	-4.859	-4.842	-5.785	-8.788	-8.381	-9.375	-9.343	-3.271	-4.518	-5.703	-5.482	-5.987	-6.358	-2.419	-6.462	-6.599	-6.911	-6.12	-6.246	-7.631	-8.129	-8.029	-7.701	-5.613	-7.237	-7.308	-5.68	-8.734	-6.193	-3.714	-2.773	-3.281	-5.103	-3.923	-3.565	0.002433	-6.4
OsLAC29	-8.096	-8.736	-7.563	-6.835	-5.892	-3.07	-3.524	-2.716	-3.931	-3.833	-0.4328	-0.2852	2.502	2.877	-8.499	-8.629	-7.951	-8.091	-8.581	-8.42	-8.287	-7.797	-8.238	-8.647	-8.391	-7.694	-7.53	-8.22	-8.144	-7.641	-7.859	-7.598	-7.437	-6.966	-7.595	-7.329	-8.389	-5.659	-8.02	-8.885	-8.256	-6.481	-7.212	-3.604	-3.048	-4.804	-1.621	-6.002
OsLAC30	-8.843	-9.175	-8.497	-9.533	-8.675	-9.332	-9.665	-9.371	-6.852	-8.709	0.4426	0.3193	-1.857	-1.491	-9.761	-9.778	-9.424	-9.828	-9.028	-9.427	-9.334	-9.532	-10.09	-10.03	-9.967	-10.56	-9.383	-10.48	-8.661	-8.344	-9.927	-9.441	-9.957	-9.971	-9.956	-8.941	-9.685	-9.477	-10.27	-9.822	-8.945	-9.021	-7.756	-8.461	-8.515	-8.325	-7.347	-8.357

## Sheet: Table S3
Table S3. The normalized signal intensities of rice laccase genes expressions under hormones treatments.
Array Element ID	Gene name	Seedling_Control	Seedling_IAA	Seedling_BAP
Os.12346.1.S1_at	OsLAC4	8.1905	8.6039	8.5844
Os.14830.1.S1_a_at	OsLAC8	11.2861	11.4094	11.514
Os.17659.1.S1_at	OsLAC29	9.9285	10.5531	9.8872
Os.34310.1.S1_at	OsLAC3	8.9411	8.9855	9.4438
Os.42420.1.S1_at	OsLAC9	6.7946	6.3152	6.3398
Os.42421.1.S1_at	OsLAC7	7.3788	5.573	6.6515
Os.45945.1.S1_at	OsLAC2	5.267	5.241	5.054
Os.46813.1.S1_at	OsLAC17	5.3938	5.4863	5.8711
Os.51049.1.S1_at	OsLAC15	9.8768	10.0915	9.7689
Os.54291.1.S1_at	OsLAC23	7.6481	7.3547	8.3868
Os.56166.1.S1_at	OsLAC27	7.5593	6.9858	7.3163
Os.5638.1.S1_at	OsLAC11	8.9157	8.9024	8.83
Os.5982.1.S1_at	OsLAC21	3.5571	4.2579	2.311
Os.8440.1.S1_at	OsLAC24	8.4826	9.1373	8.3461
Os.9615.1.S1_at	OsLAC5	10.1313	10.28	10.4332
OsAffx.12924.1.S1_at	OsLAC12	4.6438	3.9127	5.0763
OsAffx.19698.1.S1_at	OsLAC30	7.6959	6.4207	7.9261
OsAffx.21744.2.S1_x_at	OsLAC6	8.1278	7.6118	7.8342
OsAffx.27223.1.S1_at	OsLAC13	5.5351	5.0711	4.9462
OsAffx.30603.2.S1_at	OsLAC19	1.0299	2.8493	0.3576
OsAffx.30603.3.S1_at	OsLAC10	3.2633	2.1947	3.6023
OsAffx.30603.4.S1_x_at	OsLAC1	3.7757	4.1429	3.5117
OsAffx.31531.1.S1_s_at	OsLAC26	7.8263	7.3929	8.0475
OsAffx.5170.1.S1_at	OsLAC16	5.9529	4.6577	4.4188
OsAffx.7441.1.S1_at	OsLAC25	2.3324	2.9129	2.5234

## Sheet: Table S4
Table S4. The normalized signal intensities of rice laccase genes expressions under salt treatment.
Array Element ID	Gene Name	m103_control	m103_salt	ir29_control	ir29_salt	agami_control	agami_salt	ir63731_control	ir63731_salt
Os.12346.1.S1_at	OsLAC4	9.3583	8.4108	8.7952	8.4319	8.4216	8.0084	8.5827	8.2667
Os.14830.1.S1_a_at	OsLAC8	6.6693	7.6893	6.5966	7.6739	6.9891	6.645	6.8977	6.5888
Os.17659.1.S1_at	OsLAC29	1.5262	4.923	2.6526	7.688	2.5448	1.9066	2.9216	2.6661
Os.34310.1.S1_at	OsLAC3	9.2722	8.6774	8.9488	9.1491	8.9036	8.2302	8.9801	8.6043
Os.42420.1.S1_at	OsLAC9	4.5404	5.3371	6.1466	4.8801	5.5976	5.3569	4.8742	3.8077
Os.42421.1.S1_at	OsLAC7	3.8484	3.3522	2.7743	3.1524	3.0875	4.6704	3.489	3.0932
Os.45945.1.S1_at	OsLAC2	6.3351	4.0702	4.5314	5.2351	5.3838	5.2314	5.2659	3.4826
Os.46813.1.S1_at	OsLAC17	3.9449	3.015	3.9331	4.6784	4.1896	2.9627	4.3427	3.338
Os.51049.1.S1_at	OsLAC15	10.3513	8.9715	9.9529	10.6442	8.9487	8.5152	10.1021	9.7282
Os.54291.1.S1_at	OsLAC23	1.3292	3.0349	1.605	2.1072	1.7248	1.129	0.7586	1.4379
Os.56166.1.S1_at	OsLAC27	8.1303	7.8019	8.3102	7.5036	7.9489	7.9066	7.7196	7.259
Os.5638.1.S1_at	OsLAC11	10.3145	9.077	10.5245	9.4244	10.1081	9.3499	10.3406	9.6238
Os.5982.1.S1_at	OsLAC21	4.163	3.7365	4.3835	5.7284	2.9034	3.3678	3.5405	4.9025
Os.8440.1.S1_at	OsLAC24	8.9044	7.0812	6.6981	8.9872	4.4492	4.6605	7.856	7.9962
Os.9615.1.S1_at	OsLAC5	10.6598	9.491	9.9564	10.0863	10.0932	9.4041	10.202	9.7523
OsAffx.12924.1.S1_at	OsLAC12	3.9227	3.1337	3.8031	3.7406	4.1839	3.5066	3.42	3.1819
OsAffx.19698.1.S1_at	OsLAC30	3.3759	2.7524	2.6976	4.1535	1.9875	2.0811	1.5359	0.7525
OsAffx.21744.2.S1_x_at	OsLAC6	6.427	6.6148	7.8694	7.8976	6.2729	6.9663	7.9489	7.1731
OsAffx.27223.1.S1_at	OsLAC13	4.51	5.4496	5.7123	4.5601	3.8748	3.9008	5.728	4.0114
OsAffx.30603.2.S1_at	OsLAC19	1.9917	1.4953	3.0017	2.6557	1.3036	4.4811	1.4784	0.573
OsAffx.30603.3.S1_at	OsLAC10	2.046	3.1207	1.7853	3.0232	2.7178	3.1508	3.0281	2.5071
OsAffx.30603.4.S1_x_at	OsLAC1	2.8725	3.8267	2.7193	2.1764	2.6378	2.5392	2.4921	2.1105
OsAffx.31531.1.S1_s_at	OsLAC26	8.4643	8.7348	8.1581	8.0885	8.5354	8.4971	8.6283	7.9339
OsAffx.5170.1.S1_at	OsLAC16	6.3766	4.9755	7.0337	4.4136	5.1487	3.6718	5.624	5.7504
OsAffx.7441.1.S1_at	OsLAC25	3.4364	3.3543	2.1792	3.282	4.2447	4.816	3.3594	2.7371

## Sheet: Table S5
Table S5. The normalized signal intensities of rice laccase genes expressions under drought treatment.
Array Element ID	Gene Name	normal_leaves_tillering	Drought_leaves_tillering	normal_roots_tillering	Drought_roots_tillering	normal_leaves_panicle_elongation	Drought_leaves_panicle_elongation	normal_roots_panicle_elongation	Drought_roots_panicle_elongation	normal_leaves_booting	Drought_leaves_booting	normal_young_panicle_booting	Drought_young_panicle_booting
Os.12346.1.S1_at	OsLAC4	10.2251	2.8744	8.1984	8.3627	7.4041	6.3553	8.3615	8.9881	1.8565	1.5942	10.7342	2.7005
Os.14830.1.S1_a_at	OsLAC8	13.1724	6.46	9.0289	9.57	10.9074	9.4654	10.1336	11.934	12.4678	8.8523	6.3364	8.5439
Os.17659.1.S1_at	OsLAC29	2.31	5.2298	7.1308	7.8566	3.1041	8.4538	7.7936	7.7751	3.233	5.3169	2.9699	2.3903
Os.34310.1.S1_at	OsLAC3	5.69	5.5503	9.2894	8.1332	4.8996	5.6257	9.1537	8.1847	5.0893	6.0852	7.9508	6.8327
Os.42420.1.S1_at	OsLAC9	3.3923	5.6867	8.6016	5.8753	4.5308	5.3722	9.2039	5.8445	4.927	4.7343	8.5567	5.3008
Os.42421.1.S1_at	OsLAC7	4.6991	3.8868	7.2948	6.5819	4.2778	4.4222	7.7679	7.8956	5.764	5.6203	3.9334	4.1222
Os.45945.1.S1_at	OsLAC2	2.1567	2.1024	5.6041	4.669	3.4078	2.9683	5.8249	5.08	2.7782	2.1272	5.4514	2.8001
Os.46813.1.S1_at	OsLAC17	5.5383	4.6392	9.055	10.3682	4.7591	4.5486	9.0958	8.3052	4.7005	4.7837	4.2602	4.1407
Os.51049.1.S1_at	OsLAC15	5.7601	5.4197	5.6061	8.2688	5.5399	3.5684	5.5756	7.1883	6.2368	5.6952	13.6254	10.0509
Os.54291.1.S1_at	OsLAC23	3.0707	3.768	7.3695	9.413	3.7977	2.2204	8.04	9.8358	2.1171	2.6397	2.608	0.5015
Os.56166.1.S1_at	OsLAC27	3.4963	3.6455	6.2477	6.2379	5.4086	3.0574	6.4051	6.4826	4.5501	3.4064	7.4998	3.9543
Os.5638.1.S1_at	OsLAC11	7.3673	7.9031	9.2651	9.7449	7.0442	6.5863	9.286	8.6746	8.2223	9.5556	13.9207	10.3196
Os.5982.1.S1_at	OsLAC21	3.7951	2.7899	4.3224	3.2914	2.4261	3.6197	2.5575	1.0033	4.6981	3.3431	3.526	3.0224
Os.8440.1.S1_at	OsLAC24	6.7202	3.9607	4.5402	4.8786	5.7184	5.2176	3.8787	2.6698	5.4308	3.5379	5.8696	3.7682
Os.9615.1.S1_at	OsLAC5	7.0526	7.1742	8.2536	9.8752	6.0819	5.8032	8.3112	10.2405	7.3977	8.3418	12.9516	8.4407
OsAffx.12924.1.S1_at	OsLAC12	3.7338	3.3303	3.7829	5.6361	3.2354	3.5343	4.2075	6.2379	3.4505	3.4782	5.4261	3.5935
OsAffx.19698.1.S1_at	OsLAC30	4.8038	2.0439	9.9987	6.3325	4.5638	5.7428	10.2319	7.0149	4.076	3.3282	1.4671	4.8312
OsAffx.21744.2.S1_x_at	OsLAC6	5.3083	6.1918	7.5855	9.2031	3.9198	5.8122	7.3118	9.6213	4.8977	6.9862	8.7766	4.7402
OsAffx.27223.1.S1_at	OsLAC13	4.2612	4.0837	5.4292	6.4713	5.9246	4.2803	6.1621	7.2745	5.3894	4.6913	7.2564	4.28
OsAffx.30603.2.S1_at	OsLAC19	2.0108	2.0131	1.4106	2.1614	2.6945	1.3849	1.3101	0.8135	2.0099	2.5628	1.8768	1.8386
OsAffx.30603.3.S1_at	OsLAC10	3.1826	2.5797	4.7546	2.7042	3.8039	5.6828	2.8334	4.9323	2.6833	3.6248	3.7587	2.8289
OsAffx.30603.4.S1_x_at	OsLAC1	1.4201	2.6395	3.5166	3.0844	2.2164	3.8903	2.9554	3.9166	2.6564	2.4285	3.6683	2.0384
OsAffx.31531.1.S1_s_at	OsLAC26	5.65	6.7609	9.0699	8.4147	2.9514	3.9147	9.1256	7.2238	6.2508	7.3998	7.3304	5.3182
OsAffx.5170.1.S1_at	OsLAC16	3.8707	4.8033	7.0987	3.0392	4.6194	2.8902	6.7375	5.177	3.9702	2.3292	9.4989	4.5103
OsAffx.7441.1.S1_at	OsLAC25	4.0632	3.0842	4.9312	4.2865	5.342	3.0751	3.9849	5.4402	5.0138	3.8325	5.3055	5.0651

## Sheet: Table S6
Table S6. The normalized signal intensities of rice laccase genes expressions under toxic heavy metal (Cr,Cd,As,Pb) treatments.
Array Element ID	Gene Name	root_control	root_100μM_Cr	root_100μM_Cd	root_100μM_AsV	root_100μM_Pb
Os.12346.1.S1_at	OsLAC4	8.562	6.8849	8.1913	7.73	7.799
Os.14830.1.S1_a_at	OsLAC8	10.0749	9.8873	9.2948	9.8376	10.9566
Os.17659.1.S1_at	OsLAC29	10.0604	14.1219	11.9075	11.4891	10.2643
Os.34310.1.S1_at	OsLAC3	10.2974	12.8399	11.9175	9.7149	9.3526
Os.42420.1.S1_at	OsLAC9	9.5489	8.7945	8.218	7.1315	7.8113
Os.42421.1.S1_at	OsLAC7	9.8961	9.1951	8.0977	7.3034	7.275
Os.45945.1.S1_at	OsLAC2	6.7542	5.5886	6.7347	5.0164	5.5884
Os.46813.1.S1_at	OsLAC17	5.4849	10.0503	7.0785	6.5982	6.2135
Os.51049.1.S1_at	OsLAC15	7.9121	5.3135	7.495	7.382	8.4611
Os.54291.1.S1_at	OsLAC23	7.9888	13.0545	10.4306	10.0167	7.9271
Os.56166.1.S1_at	OsLAC27	8.0319	8.3263	8.5489	7.8311	8.0065
Os.5638.1.S1_at	OsLAC11	10.6177	11.9724	12.1073	10.5605	9.4604
Os.5982.1.S1_at	OsLAC21	4.3641	4.3079	3.2389	4.1931	4.6011
Os.8440.1.S1_at	OsLAC24	2.4426	5.0296	4.0821	3.1361	3.8063
Os.9615.1.S1_at	OsLAC5	10.5672	9.5094	10.7359	10.0788	10.0395
OsAffx.12924.1.S1_at	OsLAC12	9.1061	8.8621	7.9978	7.8384	8.5275
OsAffx.19698.1.S1_at	OsLAC30	9.9669	6.8028	8.2181	7.5451	7.4092
OsAffx.21744.2.S1_x_at	OsLAC6	10.1275	10.0612	10.3181	9.0577	8.9746
OsAffx.27223.1.S1_at	OsLAC13	7.269	6.0403	7.1128	6.6882	6.0473
OsAffx.30603.2.S1_at	OsLAC19	0.9139	1.7563	1.8282	2.0726	0.8638
OsAffx.30603.3.S1_at	OsLAC10	2.5495	5.6684	2.6284	3.9036	5.1951
OsAffx.30603.4.S1_x_at	OsLAC1	3.7149	6.1006	4.4374	3.553	2.6739
OsAffx.31531.1.S1_s_at	OsLAC26	9.9627	10.1131	10.6786	9.3928	8.6024
OsAffx.5170.1.S1_at	OsLAC16	6.8942	3.7777	7.0613	6.9062	6.2276
OsAffx.7441.1.S1_at	OsLAC25	4.1415	3.6034	4.4139	3.9902	3.8561

## Sheet: Table S7
Table S7. The expression levels (log2 FPKM) of laccase genes in rice roots under various Cu treatments.
	Cu Treatments
Gene Name	0 μM Cu	0.2 Μm Cu	2 μM Cu	20 μM Cu
OsLAC1	0.165488	0.0601333	0.0360789	0.659902
OsLAC2	2.03758	1.77056	1.67427	0.904482
OsLAC3	3.14257	3.43429	3.73926	4.72262
OsLAC4	3.22933	2.83853	2.11128	1.08585
OsLAC5	4.62565	4.53199	4.08821	2.21169
OsLAC6	1.90854	1.99086	1.75134	1.55021
OsLAC7	4.78121	5.08958	4.67826	5.18677
OsLAC8	4.07773	3.8911	3.4509	3.06283
OsLAC9	3.80853	4.11939	4.62063	4.59615
OsLAC10	0.334275	1.1627	1.00628	4.24863
OsLAC11	4.5707	3.85046	3.56909	3.45684
OsLAC12	5.07186	4.43958	3.6011	3.11362
OsLAC13	4.25157	3.56593	2.95886	1.43296
OsLAC14	1.46518	1.3476	0.742326	0.0106948
OsLAC15	1.72035	1.62969	0.759776	0.115679
OsLAC16	3.48869	3.22358	3.2931	3.91586
OsLAC17	0.242967	0.250588	0.120131	0.392364
OsLAC20	1.52647	1.64127	1.14292	1.93738
OsLAC21	1.94743	1.47879	1.38009	1.90842
OsLAC22	0.122325	0.0814648	0.0328673	0.0994575
OsLAC23	2.33016	2.45334	1.77401	3.62674
OsLAC25	0.0246266	0.0428292	0.123872	0.0159621
OsLAC26	4.70683	4.1222	3.87351	3.70033
OsLAC27	2.40694	2.25292	2.13847	2.40771
OsLAC28	0.295116	0.448047	0.699443	2.0317
OsLAC29	4.02435	4.28218	5.21336	7.11993
OsLAC30	5.0363	4.75265	4.14396	2.7103

## Sheet: Table S8
Table S8. Primers used in this study.
Used for	Oligonucleotide	Primer sequences(5'-3')
Construction of prokaryotic expression vector and PCR identification	pET30a-OsLAC10F	GACAAGGCCATGGCTGATATCATGGGAACAGCCAAGTTACC
	pET30a-OsLAC10R	GCTTGTCGACGGAGCTCGAATTCTTAGCACTGAGGCATGTTTG
	T7	TAATACGACTCACTATAGGG
	T7t	GCTAGTTATTGCTCAGCGG
Construction of plant overexpression vector and PCR identification	pBI121-OsLAC10F	GCTCTAGAATGGGAACAGCCAAGTTACC
	pBI121-OsLAC10R	TCCCCCGGGTTAGCACTGAGGCATGTTTG
	35S	GACGCACAATCCCACTATCC
	NOS	AATCATCGCAAGACCGGC
RT-PCR	OsLAC10F	TTCATTACGGAGACCAACT
	OsLAC10R	TGTCGTCATTCCACCACTCA
	AtActin F	AGGTATCGCTGACCGTATGAG
	AtActin R	CATCTGCTGGAATGTGCTGA
Quantitative RT-PCR analysis	qOsLAC10F	GGCGGCAACTTCACCTACC
	qOsLAC10R	GTCGTCATTCCACCACTCACC
	qOsLAC12F	AGTGCTCCGCCCAAGTTCC
	qOsLAC12R	ACGCTCATCTCTACGACCTATGC
	qOsLAC14F	TTCGTTGCTGCCTCCTCGTC
	qOsLAC14R	ACTGCCCGTTCACCGTCAC
	qOsLAC28F	ACGAGACGGTGGAGATGGTG
	qOsLAC28R	GCGAGGACGAAGAAGTTGAGG
	qOsActinF	CTCCCCCATGCTATCCTTCG
	qOsActinR	TGAATGAGT AACCACGCTCCG
